# Supplementary material
Source: PubMed Central journal article supplement (PMC2906550)
Supplement: 1001402107_pnas.1001402107_SI.pdf [file 1001402107_pnas.1001402107_SI.pdf]

# Supporting Information

Lim et al. 10.1073/pnas.1001402107

## SI Text

### Supporting Materials and Methods. Mapping of viral integration sites.

A previously developed, high-throughput method for identifying human immune deficiency virus integration sites (1) was adapted to our system as follows. The genomic DNA of infected cells was isolated using Qiagen mini DNA kit (QIAGEN). The genomic DNA was then digested with various enzymes—BamH I, Hinc II, HpyCH4 III, HpyCH4 IV, Mse I, Hind III and Taq<sup>AI</sup> [New England Biolabs (NEB)]—to minimize potential biases introduced by the choice of a few restriction enzymes. The fragmented genomic DNA was then used as the template for linear amplification with a biotinylated primer, bMLV, (5'-b-ATTTGTTAAA-GACAGGATATCAGTGGTCCAG-3') complementary to a sequence upstream of the 3' long terminal repeat (LTR) of integrated viral genome. The resulting amplification product was selectively concentrated using Dynabeads M-280 Streptavidin (Invitrogen) after PCR cleanup and then restricted by Mme I (NEB). The restricted fragments containing viral-host genome junctions were ligated to preannealed linker DNA (linkA, 5'-CGGATCCCGCATCAT-3', linkB, 5'-TGTCACACCTGGAGATATGATGCGGGATCCGNN-3') and then used for PCR with primers annealing to the 3' LTR and the linker (U5\_5L, 5'-CTCCTGGATCCCCTCTTGCAGTTGCATCCGICTT-3', hi-linker, 5'-TCACACCTGGAGATATGATGCGG-3'). The amplified viral-host genome junctions were cloned into pBS SK SP plasmid after restriction with BamH I (NEB) (the BamH I sites within primers is underlined above) and then sequenced. As a complementary approach, the conventional method for cloning viral-host genome junctions was also applied here as described in detail elsewhere (2). The retroviral-host junction sequences were mapped to locations on the human genome (February 2009 assembly) using the BLASTN program on the Ensembl genome browser web site ([www.ensembl.org](http://www.ensembl.org)). The chromosomal location mapping was considered for further statistical analysis only when the following conditions were satisfied: (i) no deletion was found before and at the CA sequence in the 3' end of 3' LTR (Fig. S1B) and (ii) a single chromosomal location can be assigned. Based on the chromosomal locations various genomic annotations for each retroviral integration site were made via genome browser web sites [Ensembl ([www.ensembl.org](http://www.ensembl.org)) and UCSC genome browser ([genome.ucsc.edu](http://genome.ucsc.edu))].

1. Kim S, Kim Y, Liang T, Sinsheimer JS, Chow SA (2006) A high-throughput method for cloning and sequencing human immunodeficiency virus type 1 integration sites. *J Virol* 80:11313–11321.

**Probability of having retroviral integrations at the same locations on the human genome.** The probability that both 16.p12.zfd1 and 375.RT.zfd1 clones integrated into the same location on the human genome is calculated as follows:

The size of human genome =  $3.1 \times 10^9$ .

For 16.p12.zfd1, the number of distinct virus-host junction sequences matching a single location on the human genome = 2

For 375.RT.zfd1, the number of distinct virus-host junction sequences matching a single location on the human genome = 4

Multiple virus-host junctions with the same sequence for each mutant case were counted one.

$$\begin{aligned} P &= {}_2C_1 \times (4/(3.1 \times 10^9)) \times ((3.1 \times 10^9 - 4)/(3.1 \times 10^9)) \\ &\sim {}_4C_1 \times (2/(3.1 \times 10^9)) \times ((3.1 \times 10^9 - 2)/(3.1 \times 10^9))^3 \\ &= 2.6 \times 10^{-9}. \end{aligned}$$

The probability that both 273.IN.zfd2 and 375.RT.zfd2 clones integrated into four common locations on the human genome is calculated as follows:

For 273.IN.zfd2, the number of distinct virus-host junction sequences matching a single location on the human genome = 22

For 375.RT.zfd2, the number of distinct virus-host junction sequences matching a single location on the human genome = 14

Multiple virus-host junctions with the same sequence for each mutant case were counted one.

$$\begin{aligned} P &\sim {}_{14}C_1 \times (22/(3.1 \times 10^9)) \times {}_{13}C_1 \\ &\times (21/(3.1 \times 10^9)) \times {}_{12}C_1 (20/(3.1 \times 10^9)) \\ &\times {}_{11}C_1 \times (19/(3.1 \times 10^9)) \times ((3.1 \times 10^9 - 22)/(3.1 \times 10^9))^{10} \\ &\sim {}_{22}C_1 \times (14/(3.1 \times 10^9)) \times {}_{21}C_1 \times (13/(3.1 \times 10^9)) \times {}_{20}C_1 \\ &\times (12/(3.1 \times 10^9)) \times {}_{19}C_1 \times (11/(3.1 \times 10^9)) \\ &\times ((3.1 \times 10^9 - 14)/(3.1 \times 10^9))^{18} = 4.6 \times 10^{-29}. \end{aligned}$$

2. Wu X, Li Y, Crise B, Burgess SM (2003) Transcription start regions in the human genome are favored targets for MLV integration. *Science* 300:1749–1751.





**Table S2. Virus-host genome junction sequences identified for 273.IN.zfd2 and 273.IN.zfd3**

| Clones      | Virus-host junction sequence      | The number of junctions with the shown sequence | Total number of sequenced junctions for each mutant | % out of the total number of sequenced junctions | Integration position on the human genome |           |
|-------------|-----------------------------------|-------------------------------------------------|-----------------------------------------------------|--------------------------------------------------|------------------------------------------|-----------|
|             |                                   |                                                 |                                                     |                                                  | Chromosome                               | Position  |
| 273.IN.zfd2 | <u>ACATT</u> TGGTAGCTGGGATGTTAG   | 22                                              | 197                                                 | 11.2                                             | X                                        | 153357666 |
| 273.IN.zfd2 | <u>ACAT</u> GATGGGCAAAGTCACCC     | 10                                              | 197                                                 | 5.1                                              | 1                                        | 94142416  |
| 273.IN.zfd2 | <u>ACATT</u> TGGGGCTAAACAAATTT    | 10                                              | 197                                                 | 5.1                                              | X                                        | 113308851 |
| 273.IN.zfd2 | <u>ACATT</u> ACAATTAATAAGTAT      | 8                                               | 197                                                 | 4.1                                              | 2                                        | 13496337  |
| 273.IN.zfd2 | <u>ACATT</u> TTCTTTCTAAAGTGCCT    | 6                                               | 197                                                 | 3.0                                              | 15                                       | 93845542  |
| 273.IN.zfd2 | <u>ACATT</u> TCATTAAGCGTAGGGC     | 6                                               | 197                                                 | 3.0                                              | 13                                       | 74454561  |
| 273.IN.zfd2 | <u>ACATT</u> TGGGCTTGGTAGGATTGG   | 5                                               | 197                                                 | 2.5                                              | 7                                        | 86384864  |
| 273.IN.zfd2 | <u>ACATT</u> TGGGGCTTAATATTTTT    | 4                                               | 197                                                 | 2.0                                              | 16                                       | 52422344  |
| 273.IN.zfd2 | <u>ACAT</u> CTAGACAGTTCAGAAAAA    | 3                                               | 197                                                 | 1.5                                              | 2                                        | 146335293 |
| 273.IN.zfd2 | <u>ACAG</u> TGGAGGGCACAGGATAT     | 3                                               | 197                                                 | 1.5                                              | 21                                       | 41419380  |
| 273.IN.zfd2 | <u>ACAT</u> CGGATCCCCGGGCTGCA     | 1                                               | 197                                                 | 0.5                                              | 11                                       | 17549051  |
| 273.IN.zfd2 | <u>ACATT</u> TGGGATCTGCCATATCA    | 1                                               | 197                                                 | 0.5                                              | 11                                       | 116161720 |
| 273.IN.zfd2 | <u>ACATT</u> TGGGGCTCTACATTACAG   | 1                                               | 197                                                 | 0.5                                              | 16                                       | 58516469  |
| 273.IN.zfd2 | <u>ACATT</u> TTCTTTCTAAGGTGCCT    | 1                                               | 197                                                 | 0.5                                              | 4                                        | 173871541 |
| 273.IN.zfd2 | <u>ACATT</u> TACTTTCTAAAGTGCCT    | 1                                               | 197                                                 | 0.5                                              | 8                                        | 12828475  |
| 273.IN.zfd2 | <u>ACATT</u> TGGGCTCCAAGATATTGC   | 1                                               | 197                                                 | 0.5                                              | 7                                        | 62333487  |
| 273.IN.zfd2 | <u>ACATT</u> TGGTAGCTGGTATGTTG    | 1                                               | 197                                                 | 0.5                                              | 3                                        | 140396792 |
| 273.IN.zfd2 | <u>ACATT</u> TGAAGTCCACAGCCTGCTGG | 1                                               | 197                                                 | 0.5                                              | 11                                       | 11519998  |
| 273.IN.zfd2 | <u>ACATT</u> GAGTCAAACTAGAGCCT    | 1                                               | 197                                                 | 0.5                                              | 15                                       | 88175538  |
| 273.IN.zfd2 | <u>ACATT</u> TGGGGCCTGGACCACT     | 1                                               | 197                                                 | 0.5                                              | 18                                       | 43408004  |
| 273.IN.zfd2 | <u>ACATT</u> GGTAGCTGGGATGTTAGG   | 1                                               | 197                                                 | 0.5                                              | X                                        | 153357665 |
| 273.IN.zfd2 | <u>ACATT</u> TGGAGACTAAATAAAAAC   | 1                                               | 197                                                 | 0.5                                              | 1                                        | 97789945  |
| 273.IN.zfd3 | <u>ACAT</u> TATTAATAGCAGTGTGCAC   | 18                                              | 101                                                 | 17.8                                             | 5                                        | 93023433  |
| 273.IN.zfd3 | <u>ACATT</u> ACCCTGGACCACTGATAT   | 15                                              | 101                                                 | 14.9                                             | 14                                       | 52491298  |
| 273.IN.zfd3 | <u>ACATT</u> GAGCCTGGACCACTGAT    | 7                                               | 101                                                 | 6.9                                              | 16                                       | 75208997  |
| 273.IN.zfd3 | <u>ACATT</u> GGAGGGGAGGAATGCCGT   | 5                                               | 101                                                 | 5.0                                              | 18                                       | 46415241  |
| 273.IN.zfd3 | <u>ACATT</u> TGGGGGCCAAGCTGCCT    | 5                                               | 101                                                 | 5.0                                              | 16                                       | 56729532  |
| 273.IN.zfd3 | <u>ACATT</u> ACCCTGGACCACTGATGT   | 3                                               | 101                                                 | 3.0                                              | 8                                        | 143413073 |
| 273.IN.zfd3 | <u>ACATT</u> TGGCGCCCCGAGTGAGGG   | 1                                               | 101                                                 | 1.0                                              | 1                                        | 180199185 |
| 273.IN.zfd3 | <u>ACATT</u> ACCCTGGACCACTGATATC  | 1                                               | 101                                                 | 1.0                                              | 17                                       | 8050843   |
| 273.IN.zfd3 | <u>ACATT</u> CCCTACCTACATTGTT     | 1                                               | 101                                                 | 1.0                                              | 19                                       | 24183658  |

Virus-host genome junction sequences are shown, along with the fraction of total junctions corresponding to that integration position for each mutant. The underlined sequences are viral, and the others are from the host genome.
